# Supplementary material for: Evaluation of a Skills Enhancement Training Intervention With Remote Coaching for Young Adults Providing Peer Support
Source: Atypon-hosted journal article supplement (doi:10.1176/appi.ps.202100476), 2022-04-20
Supplement: appi.ps.202100476.ds001.pdf [file appi.ps.202100476.ds001.pdf]

## Pre- and Post-training Ratings

| Assessment                                     | Scale<br>$\alpha$ | Pre-<br>training<br>mean <sup>a</sup> | Post-<br>training<br>mean <sup>a</sup> | Mean<br>differ-<br>ence | SD of<br>differ-<br>ence | Signifi-<br>cance <sup>b</sup> | Effect<br>Size <sup>c</sup> |
|------------------------------------------------|-------------------|---------------------------------------|----------------------------------------|-------------------------|--------------------------|--------------------------------|-----------------------------|
| <b>Skills self-assessment</b>                  |                   |                                       |                                        |                         |                          |                                |                             |
| Youth-/young adult-driven practice             | .85               | 77.91                                 | 88.67                                  | 10.75                   | 8.61                     | <.001                          | 1.25                        |
| Strengths, passions, assets, motivators (SPAM) | .81               | 80.32                                 | 88.61                                  | 8.30                    | 7.55                     | <.001                          | 1.10                        |
| Self-determination skills                      | .83               | 77.90                                 | 86.75                                  | 8.84                    | 13.39                    | .01                            | .66                         |
| Peerness                                       | .87               | 81.54                                 | 89.66                                  | 8.13                    | 7.99                     | <.001                          | 1.02                        |
| <b>Video observational rating system</b>       |                   |                                       |                                        |                         |                          |                                |                             |
| Structured/flexible planning facilitation      |                   | 2.05                                  | 2.42                                   |                         |                          | .07                            | .29                         |
| Youth/young adult-driven practice              |                   | 1.89                                  | 2.40                                   |                         |                          | .06                            | .30                         |
| Strengths, passions, assets, motivators (SPAM) |                   | 1.95                                  | 2.00                                   |                         |                          | .80                            | .04                         |
| Self-determination skills                      |                   | 1.47                                  | 2.16                                   |                         |                          | .001                           | .43                         |
| Community activities and connections           |                   | 1.84                                  | 2.26                                   |                         |                          | .06                            | .31                         |
| Overall (mean of subscores)                    |                   | 1.84                                  | 2.25                                   |                         |                          | .04                            | .33                         |
| <b>Training satisfaction</b>                   |                   |                                       |                                        |                         |                          |                                |                             |
| Importance of training goals                   |                   |                                       | 7.75                                   |                         |                          |                                |                             |
| Trainer credibility                            |                   |                                       | 9.10                                   |                         |                          |                                |                             |
| Training clarity and organization              |                   |                                       | 7.45                                   |                         |                          |                                |                             |
| Level of impact on work                        |                   |                                       | 6.55                                   |                         |                          |                                |                             |
| Confidence to apply skills in work             |                   |                                       | 7.79                                   |                         |                          |                                |                             |
| <b>Role Clarity</b>                            | .74               | 3.97                                  | 3.88                                   | -.09                    | .77                      | .61                            | .12                         |
| <b>Role-related anxiety/inefficacy</b>         | .91               | 3.08                                  | 2.64                                   | -.43                    | .66                      | .01                            | .66                         |

<sup>a</sup> For the skills self-assessment, role clarity and role-related anxiety scales, item scores were summed and then divided by the number of items on the scale.

<sup>b</sup> Wilcoxon signed-rank tests were used for the observational ratings, paired samples t-tests for others.

<sup>c</sup> Where significance was assessed using Wilcoxon signed-rank test, effect sizes were computed using  $Z/\sqrt{N}$ ; otherwise, Cohen's  $d$  was used.
